# Supplementary material
Source: PubMed Central journal article supplement (PMC6819092)
Supplement: jci-129-127565-s108.pdf [file jci-129-127565-s108.pdf]

A

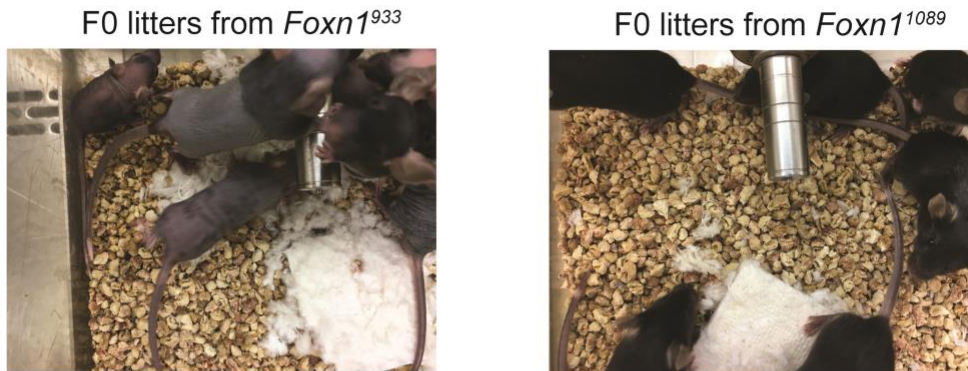

B

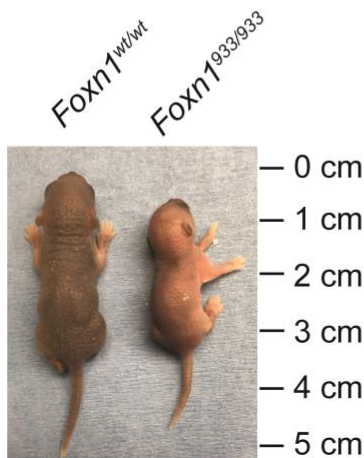

Figure S1. Founder litters (F0) from diverse *Foxn1* mutant mice only exhibit a *nu/nu* phenotype with indels or point mutations impacting both alleles affecting the DNA binding domain. A. The human *FOXN1* mutations for Pt.1 were introduced into the murine genome by CRISPR/Cas9 technologies. The DNA repair template used for each allele is shown in Figure 2A. F0 littermates from *Foxn1*<sup>933</sup> mice had a range of phenotypes including those that were nude, lacked whiskers and nails, and had a small size. DNA from the nude pups was sequenced, which revealed diverse indels and/or deletions within the DNA bindings domain that impacted both alleles. B. Wild-type *Foxn1* (*Foxn1*<sup>wt/wt</sup>) and those with a nude phenotype were necropsied, revealing a thymic aplasia selectively in those with a nude appearance. C. The mice lacking a functional *Foxn1* have a small, runted appearance compared to littermate controls.

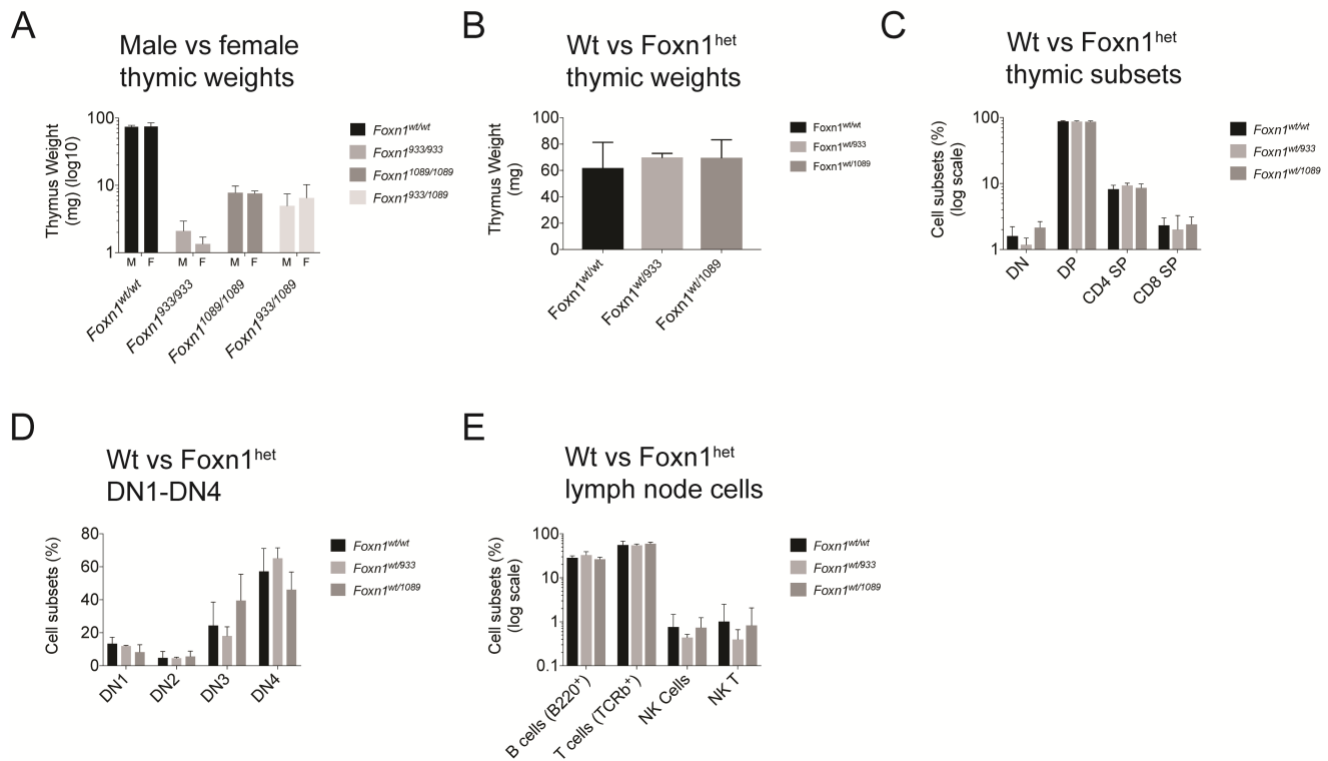

Figure S2. A thymic hypoplasia results from compound heterozygous mutations in *Foxn1* that is independent of sex and is not revealed in heterozygous mice. A. The thymus weight was calculated from the various control, heterozygous, and compound heterozygous mice was compared between male and female mice. The mice included wild-type *Foxn1* ( $Foxn1^{wt/wt}$ ), homozygous mutant ( $Foxn1^{933/933}$ ,  $Foxn1^{1089/1089}$ ), and compound heterozygous mice ( $Foxn1^{933/1089}$ ), the latter matching Pt.1. The lines were obtained by intercrossing the  $Foxn1^{wt/933}$  and  $Foxn1^{wt/1089}$  lines. Data are representative of mean  $\pm$  SEM from between 8 and 15 mice per group. There were no statistically significant differences, determined with students t-test and two-way ANOVA. B. Wild-type *Foxn1* ( $Foxn1^{wt/wt}$ ), and heterozygous mutant mice ( $Foxn1^{wt/933}$ ,  $Foxn1^{wt/1089}$ ) were obtained by intercrossing the  $Foxn1^{933/wt}$  and  $Foxn1^{1089/wt}$  lines. The thymus and lymph nodes were isolated and single cell suspensions prepared for flow cytometry. B. The thymus weight was calculated for the various control and heterozygous mice. C. Fluorochrome labeled antibodies against CD4, CD8 were used to detect DN, DP, and SP thymocyte subsets. D. The progression of thymocytes from the DN1-DN4 stages of thymocytes was assessed by cell surface staining for CD44 and CD25 following exclusion of cells expressing CD3, CD4, CD8, B220, NK1.1, TCR $\gamma\delta$ , Ter199, CD11b, and CD11c. E. Lymph nodes were collected from the indicated mice and stained with antibodies detecting cell surface CD4, CD8, B220, TCR beta, and NK1.1. The cells were analyzed by flow cytometry comparing the percentage of cells expressing B220 (B cells), TCR $\beta$  (T cells), and NK cells. For experiments in A-E, bar graphs reveal the percentage of various subsets, determined from pooled experiments using a minimum of 5 mice/line. Data are representative of mean  $\pm$  SEM with 5-15 mice per group. There were no statistically significant differences noted in the comparisons among the wild-type and heterozygous mice.

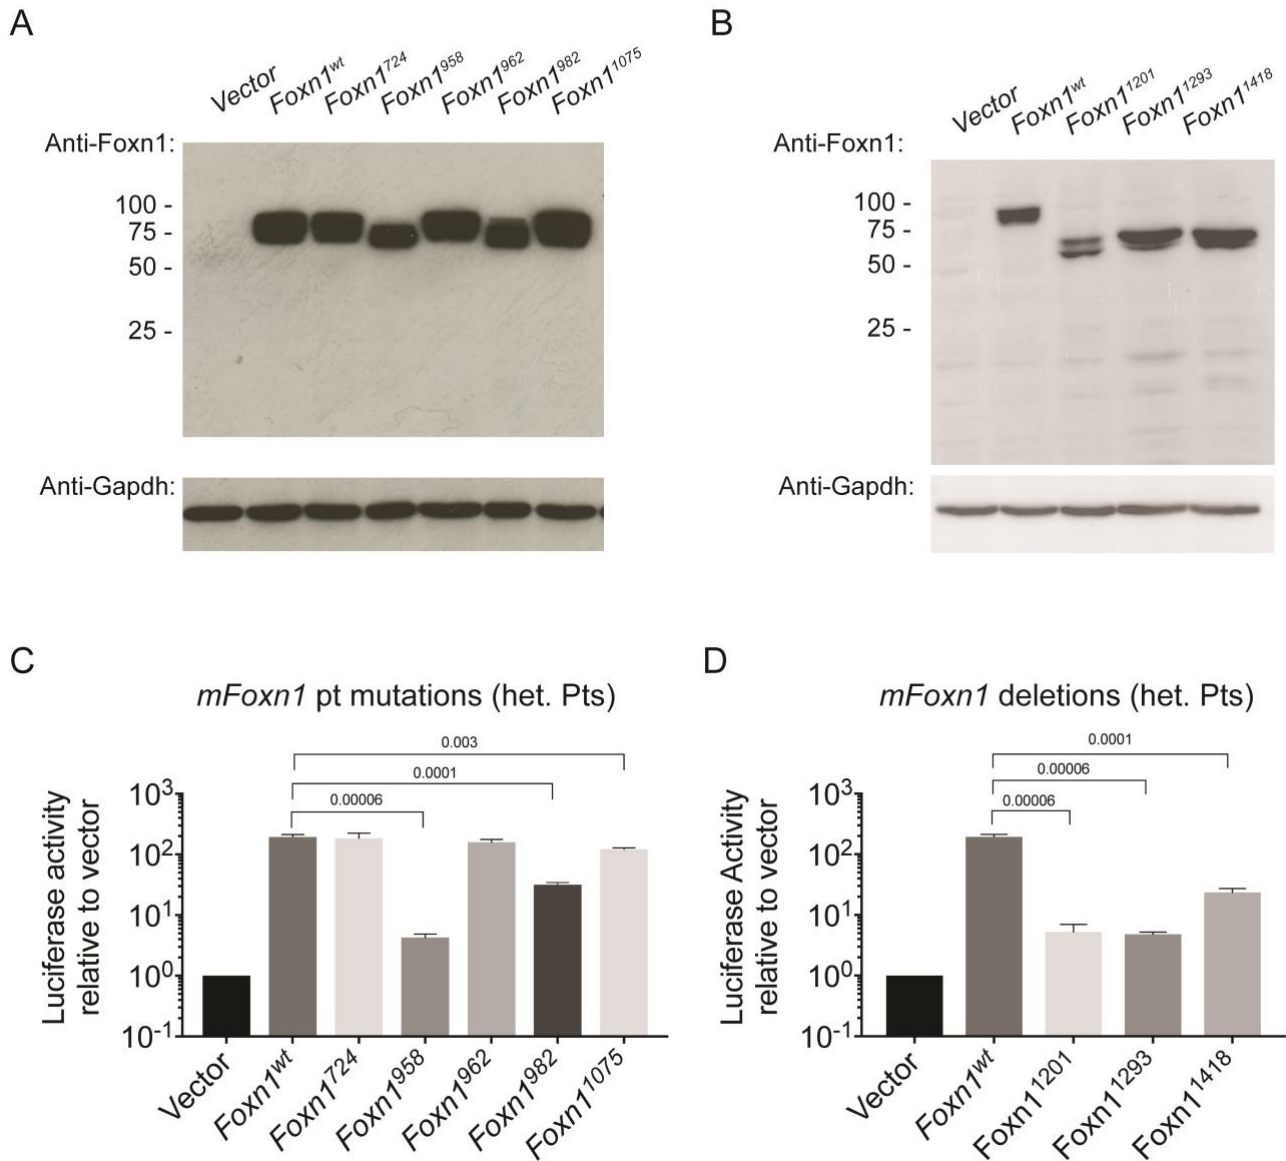

Figure S3. Diverse mutations in *FOXN1* lead to differential effects on protein expression and function. A-B. Transient transfection assays in HEK293 T cells were used with expression vectors for wild-type *Foxn1* or *Foxn1* constructs harboring the indicated mutations that matched those *FOXN1* identified in human patients. Single allelic mutations were introduced into the murine *Foxn1* cDNA. pCMV-FLAG plasmids were transfected into HEK293T cells. Forty-eight hrs. post transfection, the cells were lysed in RIPA buffers, proteins extracted and resolved by SDS-PAGE. Western blotting was performed with antibodies specific for the N-terminal region of *FOXN1*, followed by antibodies detecting *Gapdh*, which was used as a loading control. Blots are representative of 2-5 independent experiments. C-D. HEK293T cells were transfected with the indicated constructs along with a *Psmb11* luciferase reporter construct in combination with a beta-galactosidase plasmid for normalization purposes. Forty-eight hrs. post-transfection, the cells were harvested and luciferase and b-galactosidase activity was measured. The luciferase activity was normalized to beta-galactose used as an internal control. Data are representative of 3-5 independent experiments. P values were determined. \* = 0.05, \*\*\* = 0.001, \*\*\*\* = 0.0001.

FOXN1 & FOXN4 DNA binding domain homology

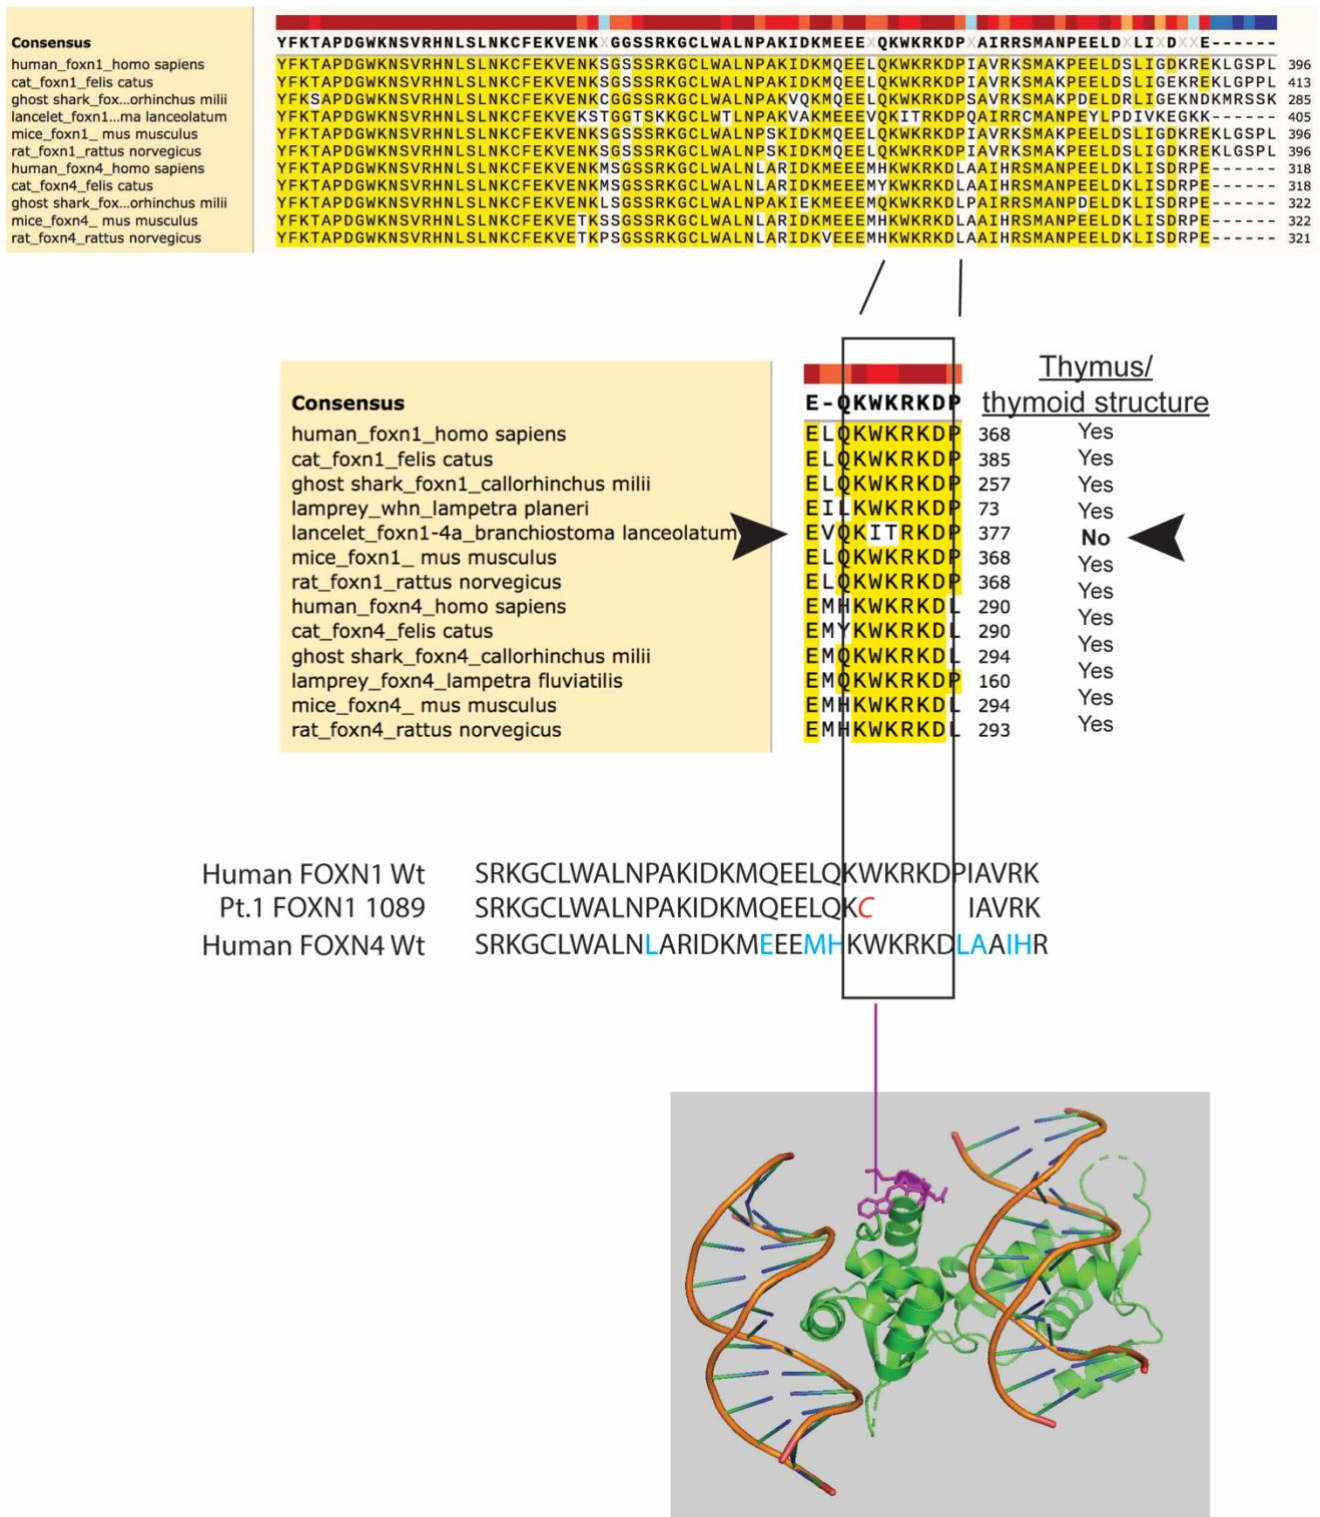

Figure S4. The Foxn1 15-nucleotide region near 1089 reveals substantial sequence homology to species with evidence of a thymus/thymoid-like structure. The amino acid sequence homology of Foxn1 and Foxn4 from the species indicated was compared for the segment comprising the DNA binding domain. A 5-amino acid sequence, deleted in FOXN1 from Pt. 1, was compared with different FOXN1/4 family members. This sequence is highly conserved in species with evidence of a thymus or thymoid-like structure. The sequence differs in lancelets, a

cephalochordate that lacks a thymoid (closed arrows). The crystal structure and the location of the W within the 5-amino acid sequence is indicated with an arrow. A full-length protein crystal has not yet been published.

**Table S1. Clinical and immunological presentations of patients identified with single *FOXN1* mutations**

|                                | Age      | ALC<br>(cells/ $\mu$ L) | CD3<br>(cells/ $\mu$ L) | CD4<br>(cells/ $\mu$ L) | CD8<br>(cells/ $\mu$ L) | CD4,<br>CD45RA <sup>+</sup><br>(% of<br>CD4) | CD4,<br>CD45RA <sup>+</sup><br>(cells/ $\mu$ L) | NK<br>(cells/ $\mu$ L) | CD19<br>(cells/ $\mu$ L) | Mitogen<br>proliferation                    |
|--------------------------------|----------|-------------------------|-------------------------|-------------------------|-------------------------|----------------------------------------------|-------------------------------------------------|------------------------|--------------------------|---------------------------------------------|
| Reference<br>Ranges<br>Ref (1) | 0-3 m    | 3400 -<br>7600          | 2500 -<br>5500          | 1600 -<br>4000          | 560 -<br>1700           | 64-95                                        | 1200 -<br>3700                                  | 170 - 1100             | 300 - 2000               | Normal<br>PHA<br>Response<br>>75,000<br>cpm |
|                                | 3-6 m    | 3900 -<br>9000          | 2500 -<br>5600          | 1800 -<br>4000          | 590 -<br>1600           | 77-94                                        | 1300 -<br>3700                                  | 170 - 830              | 430-3000                 |                                             |
|                                | 6-12 m   | 3400 -<br>9000          | 2500 -<br>5600          | 1900 -<br>5900          | 1040 -<br>1700          | 64-93                                        | 1100 -<br>3700                                  | 160 - 950              | 610 - 2600               |                                             |
|                                | 1-2 y    | 3600 -<br>8900          | 2100 -<br>6200          | 1300 -<br>3400          | 620 -<br>2000           | 63 - 91                                      | 1000 -<br>2900                                  | 180 - 920              | 720 - 2600               |                                             |
| Pt.3                           | 52 days  | -                       | 265                     | 228                     | 40                      | 41.7                                         | 111                                             | 608                    | 19                       | -                                           |
|                                | 69 days  | -                       | -                       | 235                     | -                       | -                                            | -                                               | -                      | -                        | -                                           |
|                                | 134 days | -                       | 450                     | 381                     | 78                      | 29.5                                         | 133                                             | 608                    | 1970                     | -                                           |
| Pt.4                           | 10 days  | 2600                    | 468                     | 360                     | 52                      | -                                            | -                                               | 520                    | 702                      | -                                           |
|                                | 34 days  | 1800                    | 228                     | 190                     | 38                      | -                                            | -                                               | 342                    | 1197                     | abnormal                                    |
|                                | 51 days  | 2500                    | 265                     | 228                     | 40                      | 41.7                                         | 111                                             | 608                    | 1600                     | normal                                      |
|                                | 133 days | 3100                    | 450                     | 381                     | 78                      | 29.5                                         | 133                                             | 608                    | 1970                     | -                                           |
|                                | 185 days | 2900                    | 557                     | 479                     | 75                      | 21.6                                         | 120                                             | 464                    | 1810                     | -                                           |
|                                | 276 days | 4700                    | 2359                    | 682                     | 1734                    | 4.2                                          | 99                                              | 1081                   | 1230                     | -                                           |
|                                | 395 days | -                       | 563                     | 370                     | 172                     | 15.2                                         | 86                                              | 489                    | 990                      | -                                           |
| Pt.5                           | 59 days  | -                       | 1239                    | 1071                    | 168                     | 46                                           | 744                                             | 168                    | 567                      |                                             |
|                                | 80 days  | -                       | 1212                    | 977                     | 217                     | -                                            | -                                               | 300                    | 300                      | -                                           |
|                                | 146 days | -                       | -                       | -                       | -                       | -                                            | -                                               | -                      | -                        | normal                                      |
| Pt.6                           | 8 days   | 4400                    | 1572                    | 1007                    | 617                     | -                                            | -                                               | 847                    | 1005                     | abnormal                                    |
|                                | 14 days  | -                       | 1242                    | 714                     | 511                     | -                                            | -                                               | 647                    | 776                      | -                                           |
|                                | 84 days  | 4690                    | 1670                    | 1037                    | 587                     | -                                            | -                                               | 981                    | 1825                     | abnormal                                    |

|       |           |      |      |      |     |      |      |      |      |        |
|-------|-----------|------|------|------|-----|------|------|------|------|--------|
|       | 336 days  | 4890 | 2254 | 1352 | 813 | -    | -    | 1303 | 1166 | normal |
| Pt.7  | ~ 5 m     | -    | 62   | 22   | 23  | -    | 29   | -    | -    | -      |
|       | ~ 7 m     | 2400 | 32   | 13   | 9   | 4.6  | 1    | 105  | 1280 | absent |
| Pt.8  | 6 days    | 2033 | 980  | 700  | 280 | -    | -    | 240  | 660  | normal |
| Pt.9  | 41 days   | 1716 | 274  | 156  | 106 | 9    | 154  | 502  | 918  | normal |
|       | 111 days  | 1599 | 225  | 144  | 65  | -    | -    | 558  | 880  | -      |
|       | 209 days  | 1472 | 357  | 231  | 112 | 9    | 132  | 364  | 926  | normal |
|       | ~ 12 m    | 6200 | 296  | 180  | 90  | 19.4 | 1202 | 896  | 812  | normal |
|       | ~ 18 m    | 6900 | 544  | 340  | 156 | 15.4 | 1062 | 814  | 1476 | normal |
|       | ~ 24 m    | 7200 | 444  | 293  | 127 | 16.4 | 1180 | 777  | 740  | -      |
|       | ~ 30 m    | 4800 | 430  | 281  | 112 | 11.9 | 571  | 151  | 483  | normal |
| Pt.10 | 12 days   | 2400 | 650  | 516  | 142 | 50   | 325  | 1058 | 630  | normal |
|       | 26 days   | 2300 | 734  | 557  | 168 | 48   | 352  | 414  | 1150 | -      |
|       | 53 days   | 2300 | 860  | 665  | 182 | 48.6 | 418  | 228  | 1120 | -      |
|       | 88 days   | 2600 | 871  | 697  | 172 | 55.6 | 484  | 216  | 1470 | -      |
|       | 116 days  | 2000 | 686  | 518  | 146 | 48.9 | 335  | 164  | 1130 | -      |
|       | 205 days  | 2500 | 813  | 598  | 185 | 47.4 | 385  | 230  | 1380 | -      |
|       | 282 days  | 2900 | 1218 | 835  | 322 | 43.3 | 527  | 207  | 1370 | -      |
|       | 387 days  | 2700 | 1164 | 815  | 289 | 44.3 | 516  | 251  | 1260 | normal |
|       | 477 days  | 2700 | 1175 | 745  | 605 | 32.5 | 382  | 238  | 1270 | normal |
| Pt.11 | 14 days   | 2420 | 73   | 70   | 0   | -    | -    | -    | -    | -      |
|       | 22 days   | -    | -    | -    | -   | -    | -    | -    | -    | normal |
|       | 54 days   | 1200 | 156  | 136  | 12  | -    | -    | -    | 888  | normal |
|       | 12 months | 2346 | 657  | 493  | 117 | -    | -    | 336  | 1361 | normal |
|       | 18 months | 2063 | 598  | 371  | 144 | -    | -    | 268  | 887  | normal |



|       |           |      |      |      |     |      |      |      |      |          |
|-------|-----------|------|------|------|-----|------|------|------|------|----------|
|       | 24 months | 2464 | 789  | 552  | 148 | -    | -    | 296  | 1158 | normal   |
|       | 31 months | 2477 | 991  | 666  | 198 | -    | -    | 648  | 1065 | normal   |
| Pt.12 | 27 days   | 2210 | 930  | 782  | 135 | 23.7 | 524  | 398  | 824  | normal   |
|       | 53 days   | 2560 | 1167 | 970  | 161 | 28.4 | 727  | 351  | 968  |          |
|       | 73 days   | 3120 | 1289 | 1067 | 175 | 23.2 | 724  | 309  | 1432 |          |
|       | 104 days  | 3330 | 1395 | 1099 | 233 | 23.6 | 786  | 543  | 1335 |          |
|       | 227 days  | 4420 | 1830 | 1339 | 415 | 23.7 | 1048 | 424  | 2148 |          |
|       | 377 days  | 4145 | 1699 | 1256 | 344 | 19.9 | 825  | 642  | 1753 |          |
|       | 496 days  | 4470 | 1851 | 1269 | 447 | 17.1 | 764  | 407  | 2172 |          |
| Pt.13 | 9 days    | 3500 | 538  | 464  | 81  | -    | -    | 1970 | 707  | -        |
|       | 31 days   | 3920 | 706  | 545  | 125 | -    | -    | 1917 | 1051 | -        |
|       | 12 months | -    | 943  | 655  | 204 | -    | -    | 1413 | 1917 | normal   |
| Pt.14 | 61 days   | -    | 463  | 337  | 91  | -    | -    | 607  | 2058 | -        |
|       | 89 days   | -    | 359  | 249  | 85  | -    | -    | 234  | 1792 | -        |
|       | 118 days  | -    | 409  | 300  | 81  | -    | -    | 128  | 1471 | -        |
|       | 181 days  | -    | 463  | 337  | 91  | -    | -    | 191  | 1441 | -        |
| Pt.15 | 29 days   |      | 63   | 58   | 5   | -    | -    | 282  | 1207 | abnormal |
|       | 36 days   |      | 53   | 48   | 2   | -    | -    | 440  | 1375 | -        |
| Pt.16 | 5 days    | -    | 7    | 1    | 1   | 1    | 5    | 223  | 382  | -        |
|       | 9 days    | -    | 11   | 3    | 4   | 1    | 12   | 364  | 508  | -        |
|       | 46 days   | -    | -    | -    | -   | -    | -    | -    | -    | normal   |
|       | 64 days   | -    | 107  | 93   | 14  | 1    | 8    | 248  | 668  | -        |
|       | 87 days   | -    | 91   | 81   | 9   | 2    | 15   | 179  | 706  | -        |



1. Shearer WT, Rosenblatt HM, Gelman RS, Oyomopito R, Plaeger S, Stiehm ER, et al. Lymphocyte subsets in healthy children from birth through 18 years of age: the Pediatric AIDS Clinical Trials Group P1009 study. *The Journal of allergy and clinical immunology*. 2003;112(5):973-80.

**Table S2. Heterozygous and compound heterozygous mutations identified in human *FOXN1***

| Identifier | DNA Mutation     | Protein Coding Mutation | Domain Affected | Predicted Protein Length (amino acids) | Protein Function (% of WT) (Luciferase Assay) |
|------------|------------------|-------------------------|-----------------|----------------------------------------|-----------------------------------------------|
| Normal     | Wild-type        | N/A                     | N/A             | 1-648                                  | 100%                                          |
| Pt.1       | c.933_936dupACCC | p.T313fsX169            | DNA binding     | 1-480                                  | 1.5%                                          |
| Pt.1       | c.1089_1103del15 | p.W363C                 | DNA binding     | 1-643                                  | 31%                                           |
| Pt.2       | c.1288C>T        | p.P430S                 | Transactivation | 1-648                                  | 100%                                          |
| Pt.2       | c.1465delC       | p.R489fsX61             | Transactivation | 1-548                                  | 18%                                           |
| Pts.3-4    | c.1465delC       | p.R489fsX61             | Transactivation | 1-548                                  | 18%                                           |
| Pt.5       | c.724C>T         | p.P242S                 | Exon 5          | 1-648                                  | 95%                                           |
| Pt.6       | c.958C>T         | p.R320W                 | DNA binding     | 1-648                                  | 2%                                            |
| Pt.7       | c.962A>G         | p.H321R                 | DNA binding     | 1-648                                  | 82%                                           |
| Pt.8       | c.982T>C         | p.C328R                 | DNA binding     | 1-648                                  | 16%                                           |
| Pt.9       | c.1075G>A        | p.E359K                 | DNA binding     | 1-648                                  | 63%                                           |
| Pts.10-14  | c.1201-1216      | p.A406fsX144            | Exons 8-9       | 1-453                                  | 3%                                            |
| Pt.15      | c.1293delC       | p.P432fsX118            | Exons 8-9       | 1-648                                  | 2%                                            |
| Pt.16      | c.1418delC       | p.H473fsX77             | Exons 8-9       | 1-648                                  | 12%                                           |

**Table S3. Differentially expressed genes from normal and hypoplastic fetal thymic lobes**

| Fetal thymic lobes from indicated genotype |                               |                 |                                  |       |
|--------------------------------------------|-------------------------------|-----------------|----------------------------------|-------|
| Transcripts                                | <i>Foxn1</i> <sup>wt/wt</sup> |                 | <i>Foxn1</i> <sup>933/1089</sup> |       |
|                                            | Mean <sup>a</sup>             | SD <sup>a</sup> | Mean                             | SD    |
| <i>Foxn1</i>                               | 373                           | 175             | 134                              | 62    |
| <i>Plcd1</i>                               | 226                           | 35              | 83 <sup>b</sup>                  | 63    |
| <i>TGFB1</i>                               | 761                           | 134             | 148                              | 34    |
| <i>Fgf12</i>                               | 160                           | 33              | 96                               | 19    |
| <i>Bmpr1A</i>                              | 44                            | 5               | 57 <sup>c</sup>                  | 18    |
| <i>Msx1</i>                                | 4                             | 2               | 5                                | 2     |
| <i>Lef1</i>                                | 48                            | 28              | 14                               | 2     |
| <i>Dsc2</i>                                | 1033                          | 175             | 88                               | 15    |
| <i>Akt1</i>                                | 251                           | 55              | 228                              | 121   |
| <i>Akt3</i>                                | 2590                          | 176             | 5801                             | 2665  |
| <i>Gata3</i>                               | 43                            | 13              | 145                              | 54    |
| <i>Pip2(Pik3CA)</i>                        | 173                           | 37              | 150                              | 4     |
| <i>Pkca (Prkca)</i>                        | 135                           | 19              | 163                              | 3     |
| <i>Pkcd (Prkcd)</i>                        | 445                           | 43              | 404                              | 29    |
| <i>Tbx1</i>                                | 5                             | 2               | 15                               | 9     |
| <i>Pax1</i>                                | 660                           | 95              | 173                              | 74    |
| <i>Pax9</i>                                | 314                           | 42              | 227                              | 6     |
| <i>HoxA3</i>                               | 4                             | 1               | 2                                | 1     |
| <i>Eya1</i>                                | 1766                          | 298             | 10940                            | 10449 |
| <i>Six1</i>                                | 1401                          | 507             | 1225                             | 300   |
| <i>Ccl25</i>                               | 27                            | 6               | 19                               | 1     |
| <i>Dll4</i>                                | 1186                          | 322             | 86                               | 61    |

<sup>a</sup>Changes in several key transcripts is tabulated with the average and the standard deviation of triplicate isolates/group provided.

<sup>b,c</sup>Green and red reflect reduced or elevated transcript expression in the hypoplastic thymii, respectively.

| <b>Supplemental Table S4. Key Reagents and Resources</b> |                            |              |
|----------------------------------------------------------|----------------------------|--------------|
| REAGENT or RESOURCE                                      | SOURCE                     | IDENTIFIER   |
| <b>Antibodies</b>                                        |                            |              |
| Anti-Digoxigenin-AP                                      | Roche                      | 11093274910  |
| Anti-CD8-FITC                                            | Tonbo Biotech              | 35-0081-U500 |
| Anti-CD4-PE                                              | Tonbo Biotech              | 50-0041-U100 |
| Anti-TCR-b-PerCP-Cy5.5                                   | Tonbo Biotech              | 65-5961-U100 |
| Anti-CD69-APC                                            | ebioscience                | 17-0691-82   |
| Anti-CD45-PerCPCy5.5                                     | biolegend                  | 103132       |
| Anti-B220-APC                                            | Tonbo Biotech              | 20-0452-U100 |
| Anti-CD44-APC                                            | BD bioscience              | 559250       |
| Anti-CD25-FITC                                           | BD bioscience              | 553072       |
| Anti-CD8-PE                                              | Tonbo Biotech              | 50-0081-U100 |
| Anti-B220-PE                                             | BD bioscience              | 553090       |
| Anti-NK1.1-PE                                            | BD bioscience              | 553165       |
| Anti- $\gamma\delta$ TCR-PE                              | BD bioscience              | 553178       |
| Anti-CD11b-PE                                            | BD bioscience              | 557397       |
| Anti-CD11c-PE                                            | Tonbo Biotech              | 50-0114-U100 |
| Anti-CD19-PE                                             | Tonbo Biotech              | 50-0193-U100 |
| Anti-Ter-119-PE                                          | Tonbo Biotech              | 50-5921-U100 |
| Anti-FLAG mAb                                            | Sigma Chemical             | F1804        |
| Anti-Foxn1                                               | Santa Cruz Biotech         | sc271256     |
| Anti-gapdh                                               | Santa Cruz Biotech         | Sc47724      |
| <b>Bacterial and Virus Strains</b>                       |                            |              |
| XL1-Blue Supercompetent Cells                            | Agilent                    | 200236       |
| BL21-Codon PLUS                                          | Agilent                    | 230280       |
| DH5 alpha                                                | Invitrogen (Thermo-Fisher) | 18265017     |
| <b>Biological Samples</b>                                |                            |              |
| Embryos                                                  | C57BL/6 mice               |              |
| Thymus                                                   | C57BL/6 mice               |              |
| Skin                                                     | C57BL/6 mice               |              |
| Tails                                                    | C57BL/6 mice               |              |
| <b>Chemicals, Peptides, and Recombinant Proteins</b>     |                            |              |
| Turbo DNAase                                             | Invitrogen-Fisher          | AM2238       |
| <b>Critical Commercial Assays</b>                        |                            |              |
| Luciferase Assay System                                  | Promega                    | E1500        |
| MEGAscript™ T7 Transcription Kit                         | Invitrogen                 | AM1334       |
| High Capacity cDNA synthesis kit                         | ABI-Thermo Fisher          | 4368814      |
| FluoReporter™ lacZ/Galactosidase Quantitation Kit        | Thermo Fisher              | F2905        |
| <b>Deposited Data</b>                                    |                            |              |
| GEO Affymetrix Identifier                                | Mouse Clariom S            | GES134458    |
| <b>Experimental Models: Cell Lines</b>                   |                            |              |
| HEK 293T                                                 | ATCC                       | CRL-3216     |

|                                               |                               |                    |
|-----------------------------------------------|-------------------------------|--------------------|
| OP9-DII1 (stromal feeder cell line)           | Juan Carlos Zuniga-Pflucker   |                    |
| TEC427.1(thymic epithelial cell line)         | Stanislas Vukmanovic          |                    |
| <b>Experimental Models: Organisms/Strains</b> |                               |                    |
| C57BL/6                                       | The Jackson Laboratory        | #000664            |
| Foxn1 <sup>933Kl/Kl</sup> using C57Bl/6       | UTSW Transgenic Core Facility | #17 and #30 lines  |
| Foxn1 <sup>1089Kl/Kl</sup> using C57Bl/6      | UTSW Transgenic Core Facility | #B4 and #B15 lines |
| Foxn1-Cre on C57Bl/6 background               | The Jackson Laboratory        | #018448            |
| <b>Oligonucleotides</b>                       |                               |                    |
| RT-PCR Primers, cloning primers               | IDT DNA Tech                  | seeTable S5        |
| <b>Recombinant DNA plasmids</b>               |                               |                    |
| pCMV-FLAG                                     | Sigma Chemical                | V79020             |
| pCMV-mFoxn1-wt                                | van Oers Lab                  | #858               |
| pCMV-mFoxn1-933                               | van Oers Lab                  | #859               |
| pCMV-mFoxn1-1089                              | van Oers Lab                  | #860               |
| pCMV-mFoxn1-1288                              | Addgene                       | #861               |
| pCMV-mFoxn1-1465                              | van Oers lab                  | #862               |
| pCMV-mFoxn1-724                               | van Oers lab                  | #863               |
| pCMV-mFoxn1-958                               | van Oers lab                  | #864               |
| pCMV-mFoxn1-962                               | van Oers lab                  | #865               |
| pCMV-mFoxn1-982                               | van Oers lab                  | #866               |
| pCMV-mFoxn1-1075                              | van Oers lab                  | #867               |
| pCMV-mFoxn1-1201                              | van Oers lab                  | #868               |
| pCMV-mFoxn1-1293                              | van Oers lab                  | #869               |
| pCMV-mFoxn1-1418                              | van Oers lab                  | #870               |
| pCMV-mFoxn1-N4 to N1                          | van Oers lab                  | #871               |
| <b>Software and Algorithms</b>                |                               |                    |
| SnapGene                                      | GSL Biotech LLC               |                    |
| Graphpad Prism                                | Prism 7 for MAC               |                    |
| Flowjo                                        | FlowJo LLC                    |                    |
| PyMOI                                         | Python License                |                    |

**Supplemental Table S5. Oligonucleotide primers used for PCR, RT-PCR and qRT-PCR**

| Primer Name              | Oligonucleotide Identifier | Nucleotide Sequence                                            |
|--------------------------|----------------------------|----------------------------------------------------------------|
| Mouse Typing 933 F       | 1516                       | 5'-TAGACAGCTCCTTCCCCGATGGCTC-3'                                |
| Mouse Typing 933 R       | 1476                       | 5'-AGAAAGCTTGACGCCGACAGGAAGTCC-3'                              |
| Mouse Typing 933 F (WT)  | 1563                       | 5'-TAGACTGCTCCTGATGGCTGG-3'                                    |
| Mouse Typing 933 R (WT)  | 1476                       | 5'-AGAAAGCTTGACGCCGACAGGAAGTCC-3'                              |
| Mouse Typing 1089 F      | 1475                       | 5'-TCTGGTACCACATAGTAGGCGTCAAACCC-3'                            |
| Mouse Typing 1089 R      | 1517                       | 5'-GATGCTTTTCCGGACAGCTATGCA-3'                                 |
| Mouse Typing 1089 F (WT) | 1475                       | 5'-TCTGGTACCACATAGTAGGCGTCAAACCC-3'                            |
| Mouse Typing 1089 R (WT) | 1564                       | 5'-CAATGGGGTCTTTCTCTTCCA-3'                                    |
| mFoxn1 933 mutagenesis   | 1512                       | 5'-GCACTTCCCTTACTTCAAGACTGCTCCTTCCCAGTGGCTGGCAGAAGTCTGTTCCG-3' |
| mFoxn1 1089 mutagenesis  | 1473                       | 5'-CAGGAAGAAGTGCAGAAGTGCATTGCTGTGCCGAAAAGCA-3'                 |
| mFoxn1 1288 mutagenesis  | 1607                       | 5'-GCACCCAATGCATCCAGCTTCAGGCCCATGCCTG-3'                       |
| mFoxn1 1465 mutagenesis  | 1595                       | 5'-CAGCCAGGCACCCCAGGACTCACCTCTACCTG-3'                         |
| mFoxn1 724 mutagenesis   | 1649                       | 5'-GGTGGAGGCAGCTACTCTGTGCCCTACCTG-3'                           |
| mFoxn1 958 mutagenesis   | 1651                       | 5'-GCTGGAAGAATTCTGTTTGGCATAACCTGTCCCTCAAC-3'                   |
| mFoxn1 962 mutagenesis   | 1653                       | 5'-GAAGAATTCTGTTCCGCCGTAACCTGTCCCTCAAC-3'                      |
| mFoxn1 982 mutagenesis   | 1655                       | 5'-CTGTCCCTCAACAAGCGCTTTGAGAAGGTGG-3'                          |
| mFoxn1 1075 mutagenesis  | 1657                       | 5'-GACAAGATGCAGGAAAACTGCAGAAGTGG-3'                            |
| mFoxn1 1201 mutagenesis  | 1691                       | 5'-GGCTCTCCGCTGCTGGGCTGTCCAGCCCAGGTCCCATCCGGCCCATGGCACC-3'     |
| mFoxn1 1293 mutagenesis  | 1693                       | 5'-CAATGCATCCAGCTCCAGGCCCATGCCTGGCAAG-3'                       |
| mFoxn1 1418 mutagenesis  | 1695                       | 5'-CCAGCAGCCATTGTTCCACAGCCAGATGGGCATC-3'                       |

|                            |      |                               |
|----------------------------|------|-------------------------------|
| mFoxn1 Seq<br>Primer-864   | 1699 | 5'-GACCGGAAGCCTTCCAGTCAG-3'   |
| Human<br>FOXN1<br>Exon 8 F | 1736 | 5'-GAGCTGGACAGCCTCATTGGAG-3'  |
| Human<br>FOXN1<br>Exon 8 R | 1737 | 5'-CCTGGAAGTCTGAAGTCAGTGAG-3' |
| mGapdh F                   | 1583 | 5'-AGGTCGGTGTGAACGGATTTG-3'   |
| mGapdh R                   | 1584 | 5'-TGTAGACCATGTAGTTGAGGTCA-3' |
| mKrt84 F                   | 1665 | 5'-TCAGCATCTGAACCGCTTCC-3'    |
| mKrt84 R                   | 1666 | 5'-TTCTGTAGCCAAAGCCAGG-3'     |
| mKrt32 F                   | 1667 | 5'-CAGCTGCCTTTCTAAGACCTAC-3'  |
| mKrt32 R                   | 1668 | 5'-TCATTCAGGACCTGCATGGTC-3'   |
| mDsg4 F                    | 1669 | 5'-CACCTTACGGAGTGTTTAC-3'     |
| mDsg4 R                    | 1670 | 5'-GGTTGTCGTTACATCCATGAC-3'   |
| mKrt86 F                   | 1679 | 5'-GGAGCAGAGGTTGTGTGAGG-3'    |
| mKrt86 R                   | 1680 | 5'-AGGGGCAGTACCAGAGACG-3'     |
| mHox13 F                   | 1609 | 5'-ATGACGACTTCGCTGCTCCT-3'    |
| mHox13 R                   | 1610 | 5'-GGCGGTGAGATTAGGGGTGG-3'    |
| mFoxq1 F                   | 1615 | 5'-CGAGATCAACGAGTACCTCATGG-3' |
| mFoxq1 R                   | 1616 | 5'-GCATCCAGTAGTTGTCCTTGCC-3'  |
| mKrt33b F                  | 1677 | 5'-CCTGGACGAACTGACCCCTCT-3'   |
| mKrt33b R                  | 1678 | 5'-CATGGTTTTGCTTGAGACACAG-3'  |
| mDsc2 F                    | 1663 | 5'-ATTCATTGGGTCCCTTCCCAC-3'   |
| mDsc2 R                    | 1664 | 5'-CCAGTGCAATACAGGTTTCCAG-3'  |
